# Supplementary material for: Epithelial topography for repetitive tooth formation
Source: Oxford University Press journal article supplement (doi:10.1242/bio.013672), 2015-11-04
Supplement: bio013672supp.pdf [file bio013672supp.pdf]

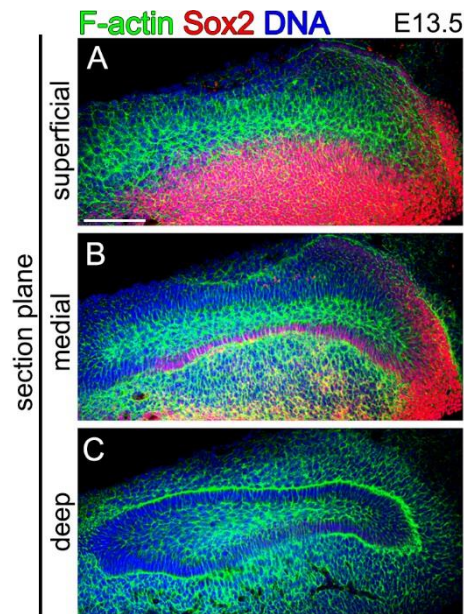

**Fig. S1. Sox2 is expressed superficially at E13.5.** (A-C) Staining of Sox2 (red), F-Actin (green) and DNA (blue) in (A) superficial, (B) medial and (C) deep oro-lingual planes of the E13.5 molar region. Sox2 is abundant in superficial layers but absent in deeper planes. Scale bar: 100  $\mu\text{m}$ .

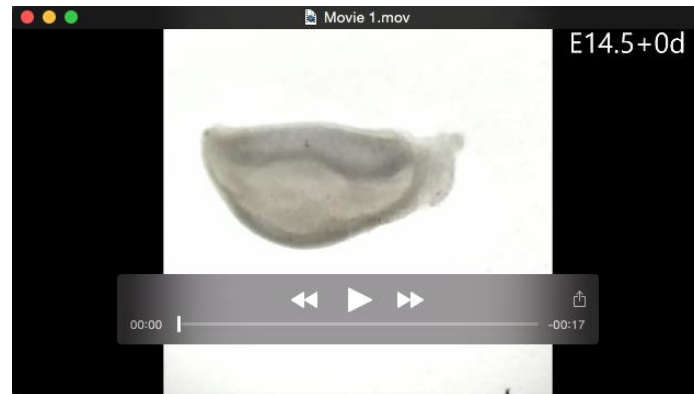

**Movie 1.** Morphed movie showing the development of the molars in culture. A molar explant was made at E14.5 and followed by 7 days.
